# Supplementary material for: A method for inferring medical diagnoses from patient similarities
Source: PubMed Central journal article supplement (PMC3844462; doi:10.1186/1741-7015-11-194), 2013-09-02
Supplement: 1741-7015-11-194-S5.pdf [file 1741-7015-11-194-S5.pdf]

USA dataset

All p-values are FDR corrected (FDR of 0.05)

| ICD code        | ICD description                                                   | p-value |
|-----------------|-------------------------------------------------------------------|---------|
| 038             | Septicemia                                                        | 0       |
| 205             | Myeloid leukemia                                                  | 0       |
| 250             | Diabetes mellitus                                                 | 0       |
| 276             | Disorders of fluid, electrolyte, and acid-base balance            | 0       |
| 291             | Alcohol-induced mental disorders                                  | 0       |
| 295             | Schizophrenic disorders                                           | 0       |
| 296             | Episodic mood disorders                                           | 0       |
| 403             | Hypertensive chronic kidney disease                               | 0       |
| 425             | Cardiomyopathy                                                    | 0       |
| 427             | Cardiac dysrhythmias                                              | 0       |
| 428             | Heart failure                                                     | 0       |
| 572             | Liver abscess and sequelae of chronic liver disease               | 0       |
| 584             | Acute kidney failure                                              | 0       |
| 585             | Chronic kidney disease (CKD)                                      | 0       |
| 39 (procedural) | Other operations on vessels                                       | 0       |
| 99 (procedural) | Other nonoperative procedures                                     | 0       |
| 202             | Other malignant neoplasms of lymphoid and histiocytic tissue      | 1.E-05  |
| 55 (procedural) | Operations on kidney                                              | 4.E-05  |
| 54 (procedural) | Other operations on abdominal region                              | 5.E-05  |
| 37 (procedural) | Other operations on heart and pericardium                         | 2.E-04  |
| 00 (procedural) | Procedures and interventions, Not Elsewhere Classified            | 2.E-04  |
| 277             | Other and unspecified disorders of metabolism                     | 2.E-04  |
| 486             | Pneumonia, organism unspecified                                   | 2.E-04  |
| 204             | Lymphoid leukemia                                                 | 2.E-04  |
| 96 (procedural) | Nonoperative intubation and irrigation                            | 4.E-04  |
| 197             | Secondary malignant neoplasm of respiratory and digestive systems | 4.E-04  |
| 491             | Chronic bronchitis                                                | 6.E-04  |
| 253             | Disorders of the pituitary gland and its hypothalamic control     | 6.E-04  |
| 288             | Diseases of white blood cells                                     | 8.E-04  |
| 94 (procedural) | Procedures related to the psyche                                  | 9.E-04  |
| 38 (procedural) | Incision, excision, and occlusion of vessels                      | 1.E-03  |
| 305             | Nondependent abuse of drugs                                       | 2.E-03  |
| 599             | Other disorders of urethra and urinary tract                      | 2.E-03  |

Israel dataset

All p-values are FDR corrected (FDR of 0.05)

| <b>ICD code</b> | <b>ICD description</b>                                  | <b>p-value</b> |
|-----------------|---------------------------------------------------------|----------------|
| 285             | Other and unspecified anemias                           | 0              |
| 414             | Other forms of chronic ischemic heart disease           | 0              |
| V42             | Organ or tissue replaced by transplant                  | 1.00E-05       |
| 275             | Disorders of mineral metabolism                         | 6.00E-05       |
| 496             | Chronic airway obstruction, not elsewhere classified    | 0.0001         |
| 599             | Other disorders of urethra and urinary tract            | 0.0002         |
| 491             | Chronic bronchitis                                      | 0.0003         |
| 486             | Pneumonia, organism unspecified                         | 0.0006         |
| 401             | Essential hypertension                                  | 0.001          |
| 584             | Acute kidney failure                                    | 0.002          |
| 250             | Diabetes mellitus                                       | 0.003          |
| 99 (Procedural) | Other nonoperative procedures                           | 0.004          |
| 345             | Epilepsy and recurrent seizures                         | 0.004          |
| 280             | Iron deficiency anemias                                 | 0.004          |
| 288             | Diseases of white blood cells                           | 0.006          |
| V45             | Other postprocedural states                             | 0.01           |
| 284             | Aplastic anemia and other bone marrow failure syndromes | 0.01           |
